# Supplementary material for: Diatoms and Plants Acyl-CoA:lysophosphatidylcholine Acyltransferases (LPCATs) Exhibit Diverse Substrate Specificity and Biochemical Properties
Source: MDPI journal article supplement (doi:10.3390/ijms22169056), 2021-08-22
Supplement: s1 [file s1]

## **Diatoms and plants acyl-CoA:lysophosphatidylcholine acyltransferases (LPCATs) exhibit diverse substrate specificity and biochemical properties**

Ada Połńska, Katarzyna Jasieniecka-Gazarkiewicz, Lingjie You, Xiahui Hao, Sylwia Klińska, Gangmin Gong and Antoni Banaś

### **Supplementary materials**

**Table S1.** LPCAT activity of proteins encoded by six different genes cloned from *P. tricornutum* with sequence similar to genes encoding acyl:CoA:lysophosphatidylcholine acyltransferases (LPCATs) in other organisms.

| Tested gene   | pmol [ <sup>14</sup> C]PC/nmol microsomal PC/min |
|---------------|--------------------------------------------------|
| Phatr3_J54709 | 0.05 ±0                                          |
| Phatr3_J11916 | 0.06±0.02                                        |
| Phatr3_J40461 | 0.14±0.02                                        |
| Phatr3_J43099 | 0                                                |
| Phatr3_J20460 | 140.4±9.3                                        |
| Phatr3_J48640 | 0                                                |

Cloned genes were heterologously expressed in yeast lacking functional gene encoding ALE1 (acyl:CoA:lysophosphatidylcholine acyltransferase of yeast). In assays we used microsomal fractions from these yeast as an enzyme source and LPC as acyl acceptor in combination with [<sup>14</sup>C]18:1-CoA as acyl donor. Values shown are differences of activities between microsomal fractions of yeast *Δale1* expressing *P. tricornutum* cloned genes and activities of control yeast (*Δale1*) harboring an empty vector. Mean values and SD are presented (data from at least two independent assays).
